# Supplementary material for: Mechanochemical Synthesis of Nickel-Modified Metal–Organic Frameworks for Reduction Reactions
Source: MDPI journal article supplement (doi:10.3390/catal11050526), 2021-04-21
Supplement: s1 [file s1]

# Supplementary Materials: Mechanochemical Synthesis of Nickel-Modified Metal–Organic Frameworks for Reduction Reactions

Paulette Gómez-López <sup>1</sup>, Martyna Murat <sup>2</sup>, José M. Hidalgo-Herrador <sup>2</sup>, Carolina Carrillo-Carrión <sup>1</sup>, Alina M. Balu <sup>1</sup>, Rafael Luque <sup>1,\*</sup> and Daily Rodríguez-Padrón <sup>1,\*</sup>

<sup>1</sup> Departamento de Química Orgánica, Campus de Rabanales, Universidad de Córdoba, Edificio Marie Curie (C-3), Ctra Nnal IV-A, Km 396, E14014 Córdoba, Spain; gomezl.paulette@gmail.com (P.G.-L.); carrillocarrión.carolina@gmail.com (C.C.-C.); qo2balua@uco.es (A.M.B.)

<sup>2</sup> Research Department, ORLEN UniCRE a.s., Revoluční 1521/84, 400 01 Ústí nad Labem, Czech Republic; martyna.murat@gmail.com (M.M.); jose.hidalgo@unicre.cz (J.M.H.-H.)

\* Correspondence: q62alsor@uco.es (R.L.); dailydggs@gmail.com (D.R.-P.)

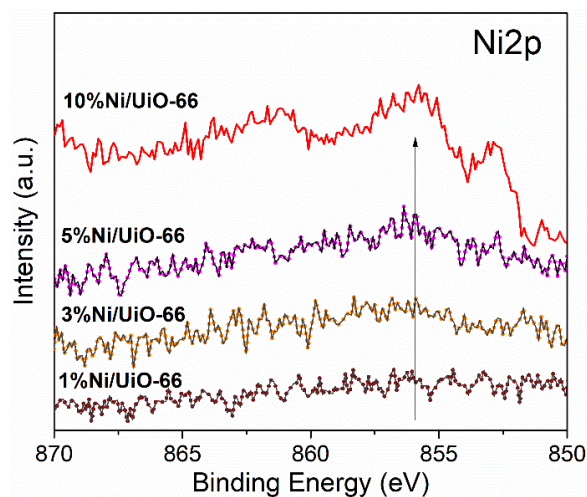

**Figure S1.** Ni 2p XPS spectra of the nickel modified samples, including the 10%Ni/Uio-66 material.

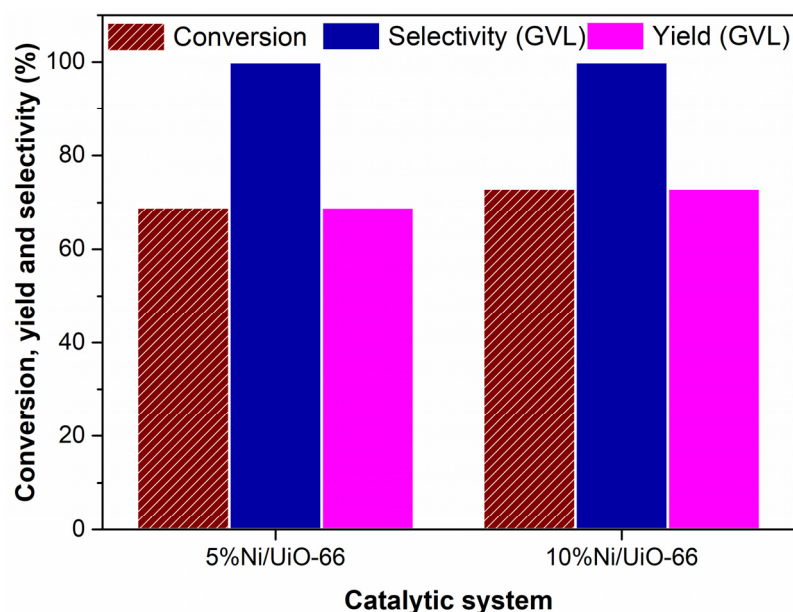

**Figure S2.** Comparative analysis of the catalytic performance in terms of conversion of methyl levulinate, selectivity and yield towards GVL of 5%Ni/Uio-66 and 10%Ni/Uio-66.
